# Supplementary material
Source: PubMed Central journal article supplement (PMC6596305)
Supplement: NIHMS1032893-supplement-Supporting_information.pdf [file NIHMS1032893-supplement-Supporting_information.pdf]

**Supporting Information for:**

**Separation of  $\beta$ -Amyloid Tryptic Peptide Species with Isomerized and Racemized L-Aspartic Residues with Ion Mobility in Structures for Lossless Ion Manipulations**

Gabe Nagy, Komal Kedia, Isaac K. Attah, Sandilya V. B. Garimella, Yehia M. Ibrahim, Vladislav A. Petyuk, Richard D. Smith\*

\*Corresponding Author: Richard D. Smith

Biological Sciences Division, Pacific Northwest National Laboratory, Richland, WA 99352, United States

Email: [rds@pnnl.gov](mailto:rds@pnnl.gov)

|                                  |                 |
|----------------------------------|-----------------|
| 1) LVFFAEDVGS <b>DK</b> [+8]     | L-Asp, L-Asp    |
| 2) LVFFAEDVGS( <b>dD</b> )K[+8]  | L-Asp, D-Asp    |
| 3) LVFFAEDVGS( <b>bD</b> )K[+8]  | L-Asp, L-isoAsp |
| 4) LVFFAEDVGS( <b>dbD</b> )K[+8] | L-Asp, D-isoAsp |

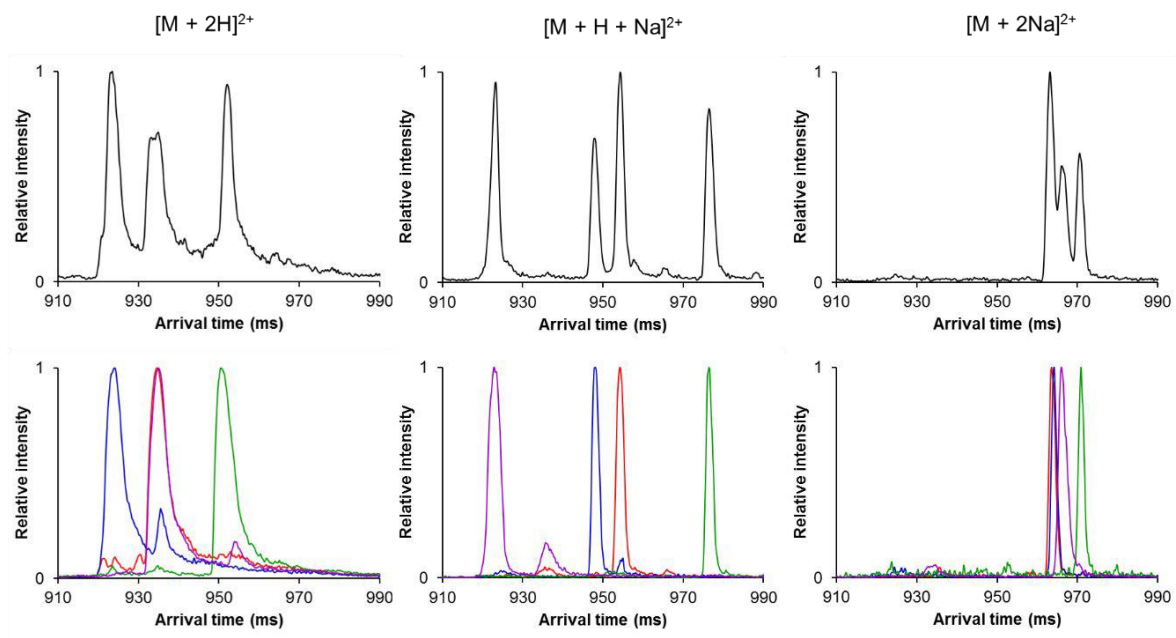

**Figure S1.** 72 m SLIM SUPER IM separation of A $\beta$  peptide epimers 1-4. All conditions were the same as those described in the experimental section.

|                            |                 |
|----------------------------|-----------------|
| 5) LVFFAE(dD)VGSDK[+8]     | D-Asp, L-Asp    |
| 6) LVFFAE(dD)VGS(dD)K[+8]  | D-Asp, D-Asp    |
| 7) LVFFAE(dD)VGS(bD)K[+8]  | D-Asp, L-isoAsp |
| 8) LVFFAE(dD)VGS(dbD)K[+8] | D-Asp, D-isoAsp |

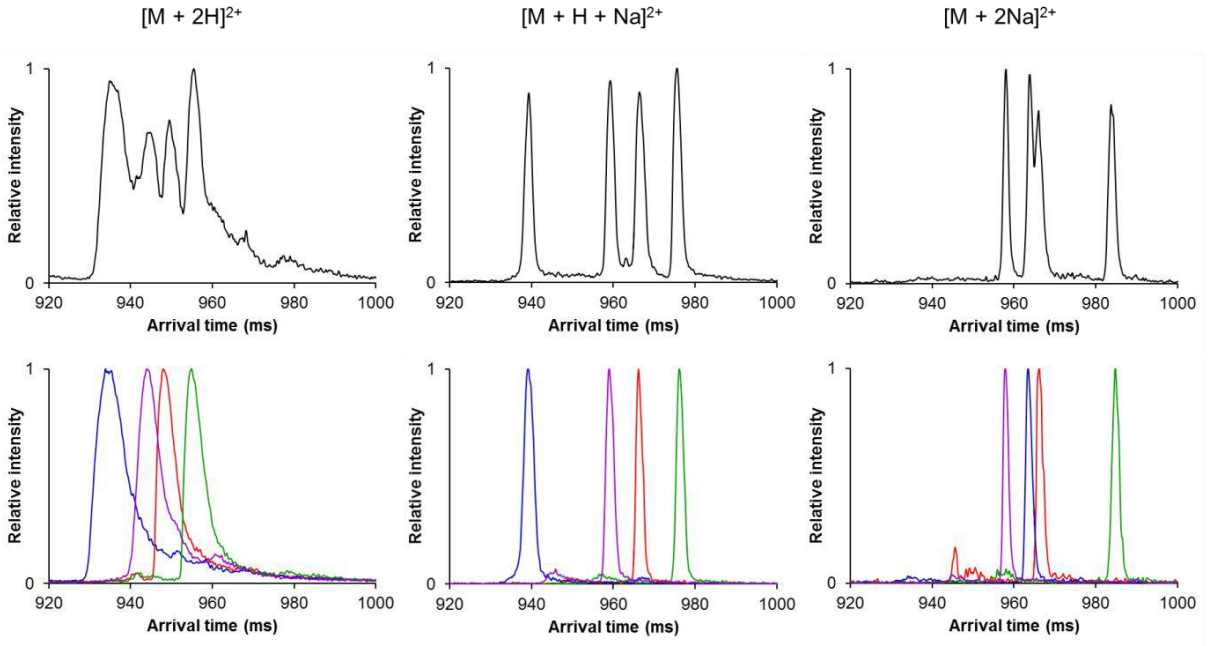

**Figure S2.** 72 m SLIM SUPER IM separation of A $\beta$  peptide epimers 5-8. All conditions were the same as those described in the experimental section.

|                             |                    |
|-----------------------------|--------------------|
| 9) LVFFAE(bD)VGSDK[+8]      | L-isoAsp, L-Asp    |
| 10) LVFFAE(bD)VGS(dD)K[+8]  | L-isoAsp, D-Asp    |
| 11) LVFFAE(bD)VGS(bD)K[+8]  | L-isoAsp, L-isoAsp |
| 12) LVFFAE(bD)VGS(dbD)K[+8] | L-isoAsp, D-isoAsp |

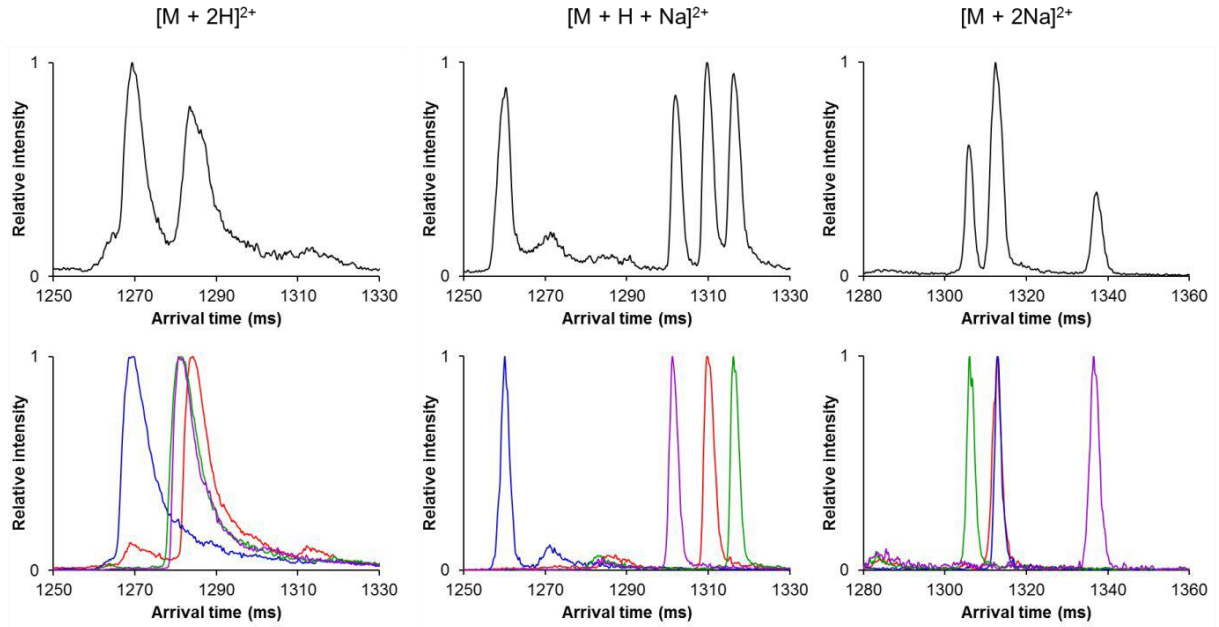

**Figure S3.** 99 m SLIM SUPER IM separation of A $\beta$  peptide epimers 9-12. All conditions were the same as those described in the experimental section.

|                                                |                    |
|------------------------------------------------|--------------------|
| 13) LVFFAE( <b>dbD</b> )VGSDK[+8]              | D-isoAsp, L-Asp    |
| 14) LVFFAE( <b>dbD</b> )VGS( <b>dD</b> )K[+8]  | D-isoAsp, D-Asp    |
| 15) LVFFAE( <b>dbD</b> )VGS( <b>bD</b> )K[+8]  | D-isoAsp, L-isoAsp |
| 16) LVFFAE( <b>dbD</b> )VGS( <b>dbD</b> )K[+8] | D-isoAsp, D-isoAsp |

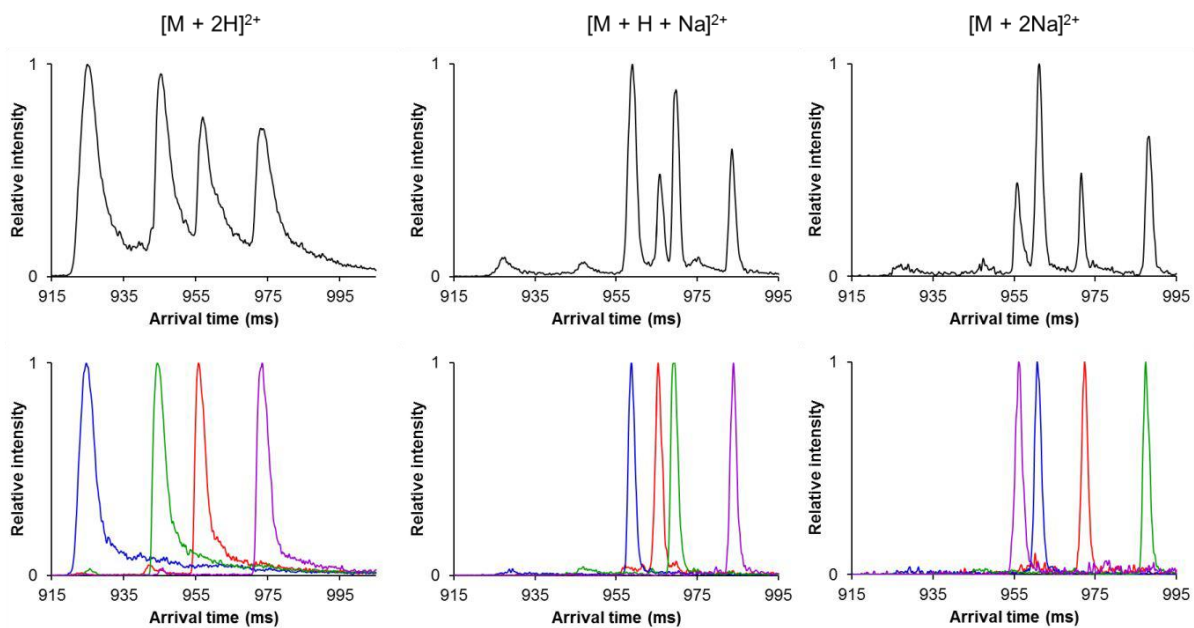

**Figure S4.** 72 m SLIM SUPER IM separation of A $\beta$  peptide epimers 13-16. All conditions were the same as those described in the experimental section.

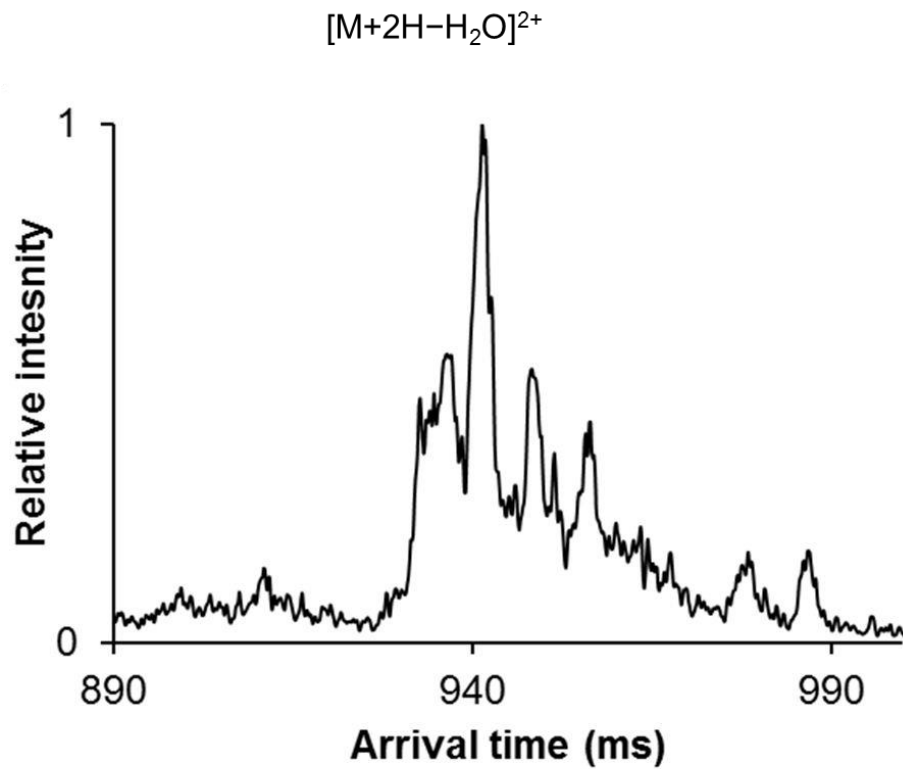

**Figure S5.** 72 m SLIM SUPER IM separation of A $\beta$  peptide epimer 5-8 mixture. The dehydrated adducts each exhibit multiple conformations for each peptide.

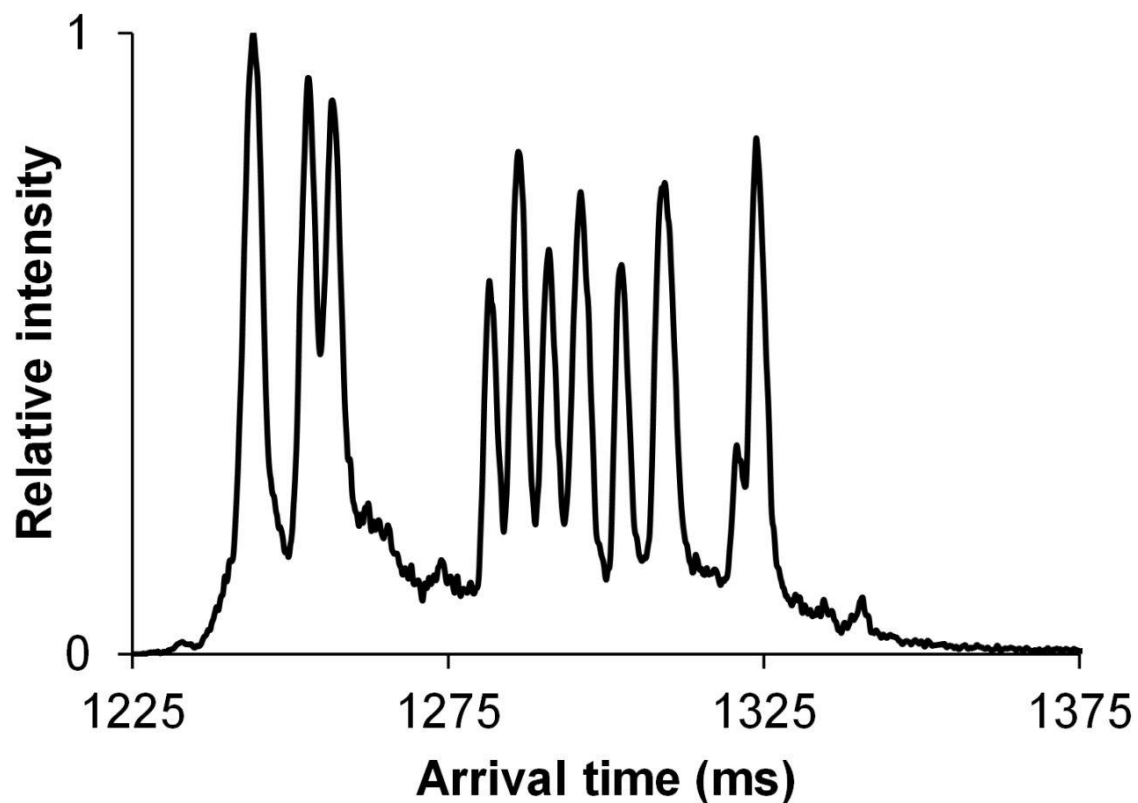

**Figure S6.** 99 m SLIM SUPER IM separation of a mixture of all 16 A $\beta$  peptides as their [M+H+Na]<sup>2+</sup> adducts. Future work is ongoing in coupling our SLIM SUPER IM separations to a front-end LC separation to resolve all 16 possible A $\beta$ 17-28 peptides.

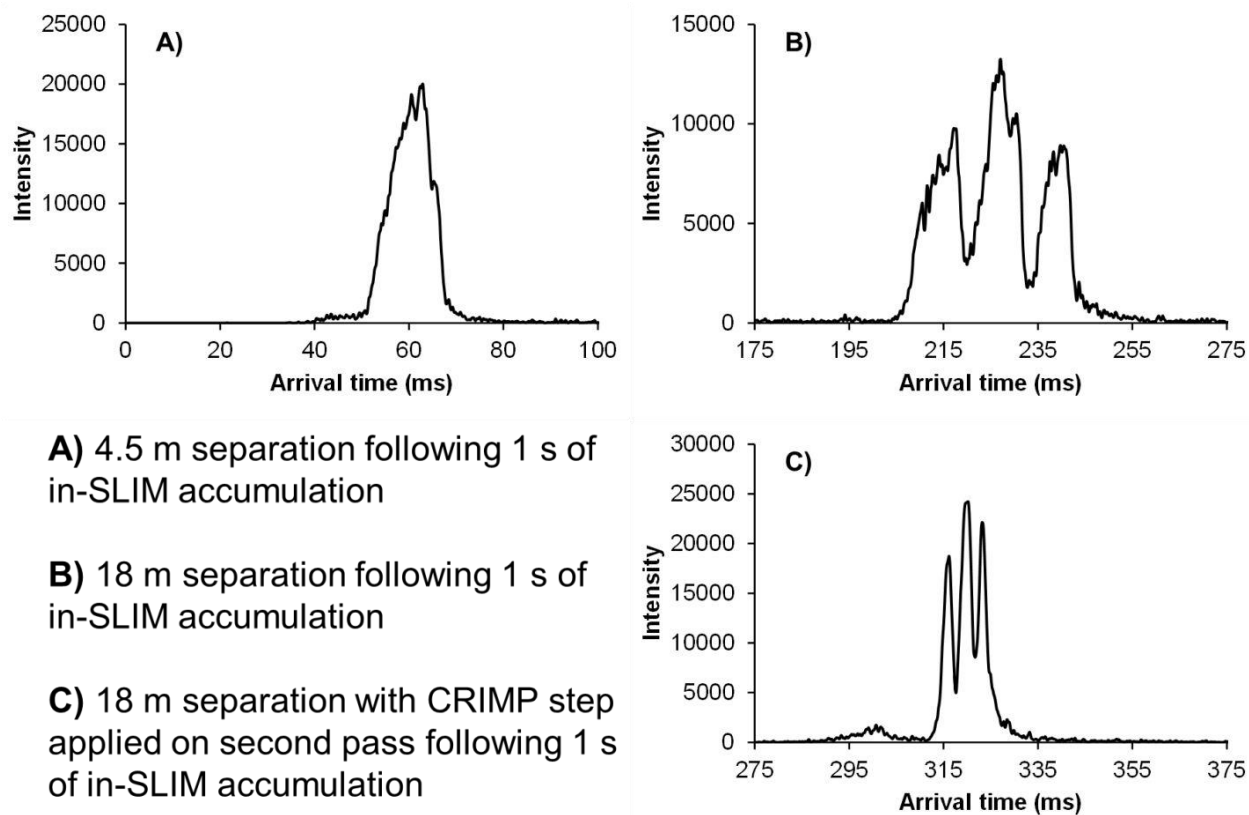

**Figure S7.** Demonstration of benefit of CRIMP step on improving S/N as well as overcoming the inherently broad peak widths associated with accumulating 1 s of ions during in-SLIM accumulation for epimer set 1-4. It is also seen that 18 m of separation is insufficient for their baseline resolution; baseline separation was achieved after 72 m (Figure 4B, manuscript) as  $[M+H+Na]^{2+}$ . Legend is located in bottom left corner of the figure. 5 individual SLIM SUPER IM separations were summed to produce each IM separation shown.



| name      | RT (min) | sequence with D/N forms                | D/N forms          |
|-----------|----------|----------------------------------------|--------------------|
| bA1728_1  | 25.66    | LVFFAE <b>D</b> VGS <b>D</b> K         | L-Asp, L-Asp       |
| bA1728_2  | 25.89    | LVFFAE <b>D</b> VGS( <b>dD</b> )K      | L-Asp, D-Asp       |
| bA1728_3  | 26.21    | LVFFAE <b>D</b> VGS( <b>bD</b> )K      | L-Asp, L-isoAsp    |
| bA1728_4  | 26.27    | LVFFAE <b>D</b> VGS( <b>dbD</b> )K     | L-Asp, D-isoAsp    |
| bA1728_5  | 25.33    | LVFFAE( <b>dD</b> )VGS <b>D</b> K      | D-Asp, L-Asp       |
| bA1728_6  | 25.33    | LVFFAE( <b>dD</b> )VGS( <b>dD</b> )K   | D-Asp, D-Asp       |
| bA1728_7  | 25.61    | LVFFAE( <b>dD</b> )VGS( <b>bD</b> )K   | D-Asp, L-isoAsp    |
| bA1728_8  | 25.55    | LVFFAE( <b>dD</b> )VGS( <b>dbD</b> )K  | D-Asp, D-isoAsp    |
| bA1728_9  | 25.61    | LVFFAE( <b>bD</b> )VGS <b>D</b> K      | L-isoAsp, L-Asp    |
| bA1728_10 | 25.66    | LVFFAE( <b>bD</b> )VGS( <b>dD</b> )K   | L-isoAsp, D-Asp    |
| bA1728_11 | 25.72    | LVFFAE( <b>bD</b> )VGS( <b>bD</b> )K   | L-isoAsp, L-isoAsp |
| bA1728_12 | 25.77    | LVFFAE( <b>bD</b> )VGS( <b>dbD</b> )K  | L-isoAsp, D-isoAsp |
| bA1728_13 | 26.05    | LVFFAE( <b>dbD</b> )VGS <b>D</b> K     | D-isoAsp, L-Asp    |
| bA1728_14 | 26       | LVFFAE( <b>dbD</b> )VGS( <b>dD</b> )K  | D-isoAsp, D-Asp    |
| bA1728_15 | 24.29    | LVFFAE( <b>dbD</b> )VGS( <b>bD</b> )K  | D-isoAsp, L-isoAsp |
| bA1728_16 | 25.83    | LVFFAE( <b>dbD</b> )VGS( <b>dbD</b> )K | D-isoAsp, D-isoAsp |

**Figure S8.** Peptide retention times under a 90 minute reversed-phase LC gradient with a Waters C18 column (100  $\mu$ m i.d.  $\times$  10 cm, 1.7  $\mu$ m BEH particles) at 40  $^{\circ}$ C. Mobile phase: A) water (0.5% formic acid), B) acetonitrile (0.5% formic acid). Gradient: 0 min, 0.5% B, 0.500  $\mu$ L/min; 11 min, 0.5% B, 0.500  $\mu$ L/min; 11.5 min, 0.5% B, 0.400  $\mu$ L/min; 13 min, 0.5% B, 0.400  $\mu$ L/min; 13.5 min, 5% B, 0.400  $\mu$ L/min; 63.5 min, 30% B, 0.400  $\mu$ L/min; 65 min, 95% B, 0.500  $\mu$ L/min; 80 min, 95% B, 0.500  $\mu$ L/min; 83 min, 0.5% B, 0.500  $\mu$ L/min.

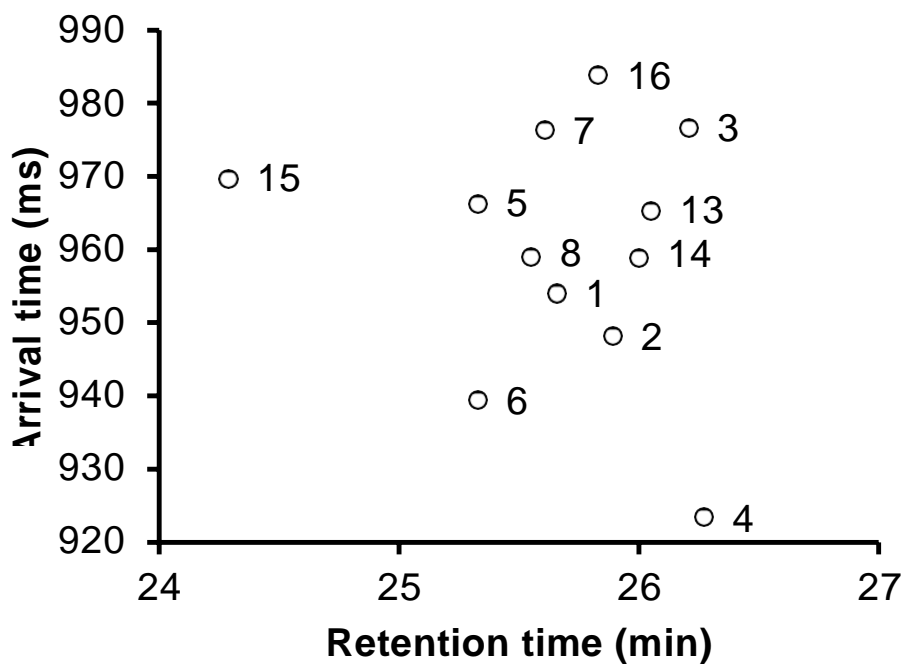

**Figure S9.** 2-D plot of peptides subjected to 72 m of SLIM SUPER IM separation, with their individual LC retention times on the x-axis and individual arrival times on the y-axis. Peptides 9-12 were not included since they required 99 m of SLIM SUPER IM separation to be fully resolved.
